# Supplementary material
Source: HighWire-hosted journal article supplement (https://militaryhealth.bmj.com/content/169/1/69)

Torso coverage widths

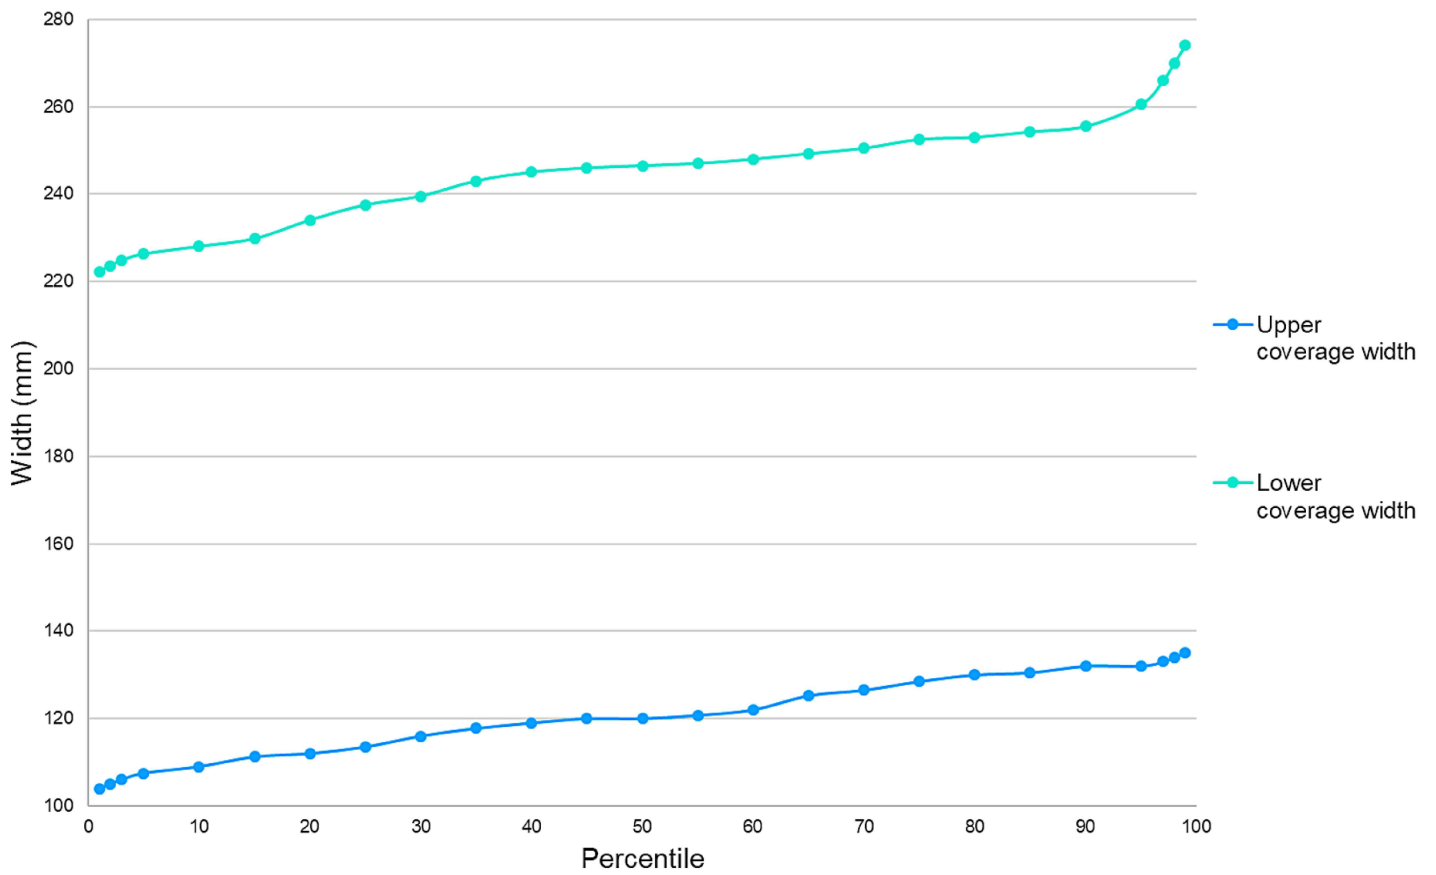

Supplement: inline-supplementary-material-2 [file inline-supplementary-material-2.pdf]
